## CORRECTION

# Correction: Integrated analysis of single-cell embryo data yields a unified transcriptome signature for the human pre-implantation epiblast (doi: 10.1242/dev.158501)

**Giuliano G. Stirparo, Thorsten Boroviak, Ge Guo, Jennifer Nichols, Austin Smith and Paul Bertone**

The supplementary data for *Development* (2018) **145**, dev158501 (doi: 10.1242/dev.158501) was incomplete: some rows of data in Table S8 were missing. The intact file is now available online at <http://dev.biologists.org/content/145/3/dev158501.supplemental>.

The authors apologise to readers for any inconvenience.
